# Supplementary material for: A multidentate copper complex on magnetic biochar nanoparticles as a practical and recoverable nanocatalyst for the selective synthesis of tetrazole derivatives
Source: Royal Society of Chemistry journal article supplement (doi:10.1039/d4na00284a), 2024-01-01
Supplement: d4na00284a1.pdf [file d4na00284a1.pdf]

# Multidentate copper complex on magnetic biochar nanoparticles as a practical and recoverable nanocatalyst for the selective synthesis of tetrazole derivatives

Marwan Majeed Maseer<sup>1</sup>, Tavan Kikhavani<sup>1,\*</sup>, Bahman Tahmasbi<sup>2,\*</sup>

<sup>1</sup> Department of Chemical Engineering, Faculty of Engineering, Ilam University, Ilam, Iran. E-mail:

*t.kikhavandi@ilam.ac.ir*

<sup>2</sup> Department of Chemistry, Faculty of Science, Ilam University, P.O. Box 69315516, Ilam, Iran. E-mail:

*b.tahmasbi@ilam.ac.ir, bah.tahmasbi@gmail.com*

## Abstract:

In this work, biochar nanoparticles (B-NPs) were synthesized by pyrolysis of chicken manure. Then, the B-NPs were magnetized by Fe(0) nanoparticles. Then, the surface of biochar magnetic nanoparticles (FeB-MNPs) was modified by (3-chloropropyl)trimethoxysilane (3Cl-PTMS). Finally, a multidentate copper complex of 2,2'-(propane-1,3-diylbis(oxy))dianiline (P.bis(OA)) was immobilized on the surface of modified FeB-MNPs, which labelled as Cu-P.bis(OA)@FeB-MNPs. Cu-P.bis(OA)@FeB-MNPs was investigated as commercial, homoselective, practical, and recyclable nanocatalyst in the synthesis of 5-substituted-1H-tetrazole compounds through [3+2] cycloaddition of sodium azide (NaN<sub>3</sub>) and organo-nitriles in PEG-400 as a green solvent. Cu-P.bis(OA)@FeB-MNPs was characterized by wavelength dispersive X-ray spectroscopy (WDX), scanning electron microscopy (SEM), thermogravimetric analysis (TGA), energy-dispersive X-ray spectroscopy (EDS), vibrating-sample magnetometer (VSM), atomic absorption spectroscopy (AAS) and N<sub>2</sub> adsorption-desorption (BET method) techniques. Cu-P.bis(OA)@FeB-MNPs was recovered and reused for several runs in the synthesis of tetrazoles.

**Keywords:** Biochar nanoparticles, homoselective catalyst, magnetic nanoparticles, reusable nanocatalyst, 5-substituted-1H-tetrazoles, sodium azide, multidentate copper complex.

## <sup>1</sup>H NMR spectral data

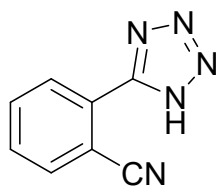

### 2-(1H-tetrazol-5-yl)benzonitrile

<sup>1</sup>H NMR (250 MHz, DMSO):  $\delta_{\text{H}} = 8.06$  (d,  $J = 5.42$  Hz, 2H), 7.92 (t,  $J = 7.05$  Hz, 1H), 7.76 (t,  $J = 7.12$  Hz, 1H) ppm.

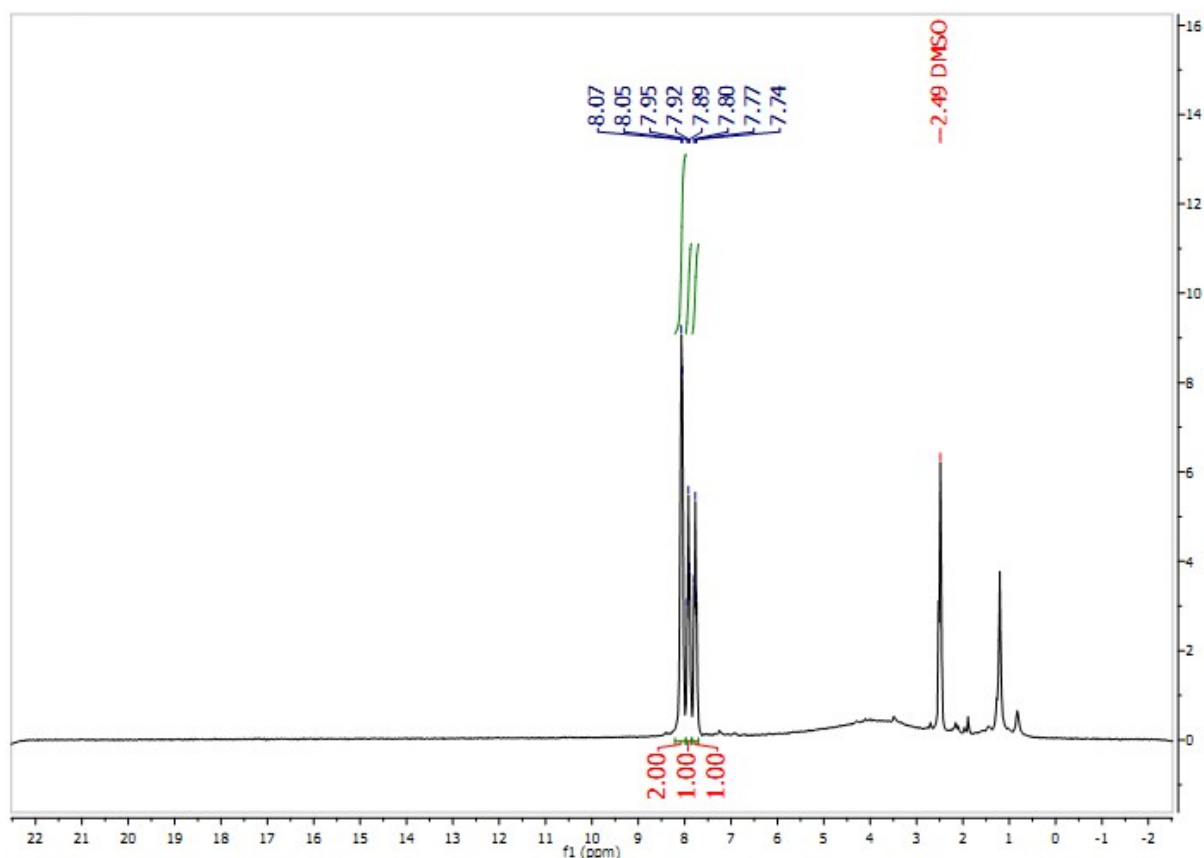

<sup>1</sup>H NMR spectrum of 2-(1H-tetrazol-5-yl)benzonitrile from [3+2] cycloaddition of  $\text{NaN}_3$  with phthalonitrile

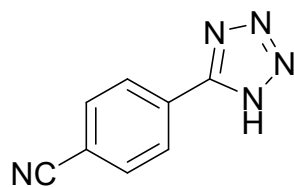

4-(1H-tetrazol-5-yl)benzotrile

$^1\text{H}$  NMR (250 MHz, DMSO):  $\delta_{\text{H}} = 8.20$  (d,  $J = 8.22$  Hz, 2H),  $8.08$  (d,  $J = 4.95$  Hz, 2H) ppm.

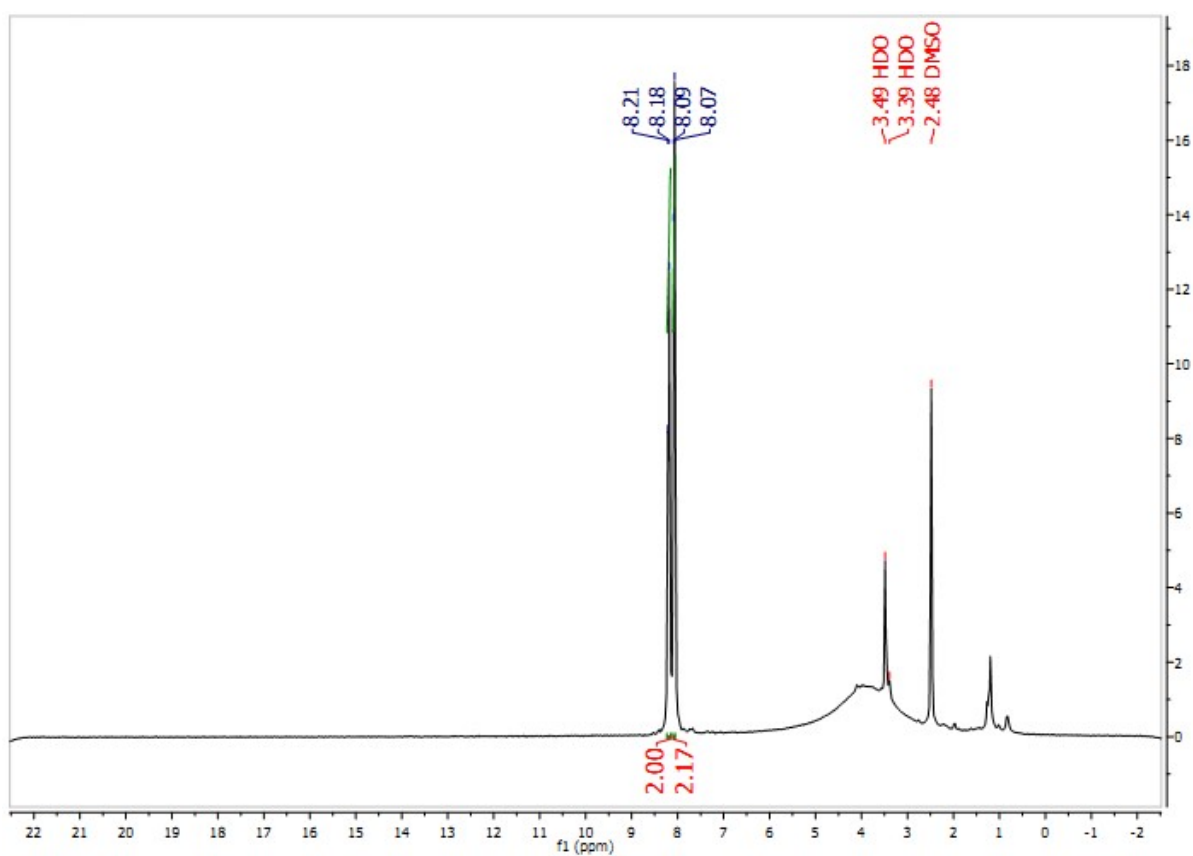

$^1\text{H}$  NMR spectrum of 4-(1H-tetrazol-5-yl)benzotrile from [3+2] cycloaddition of  $\text{NaN}_3$  with terephthalonitrile

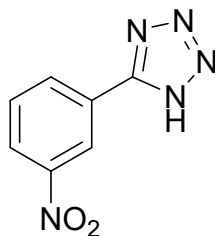

**5-(3-nitrophenyl)-1H-tetrazole**

$^1\text{H}$  NMR (250 MHz, DMSO):  $\delta_{\text{H}} = 8.81$  (s, 1H), 8.42 (t,  $J = 8.25$  Hz, 2H), 7.88 (t,  $J = 7.62$  Hz, 1H) ppm.

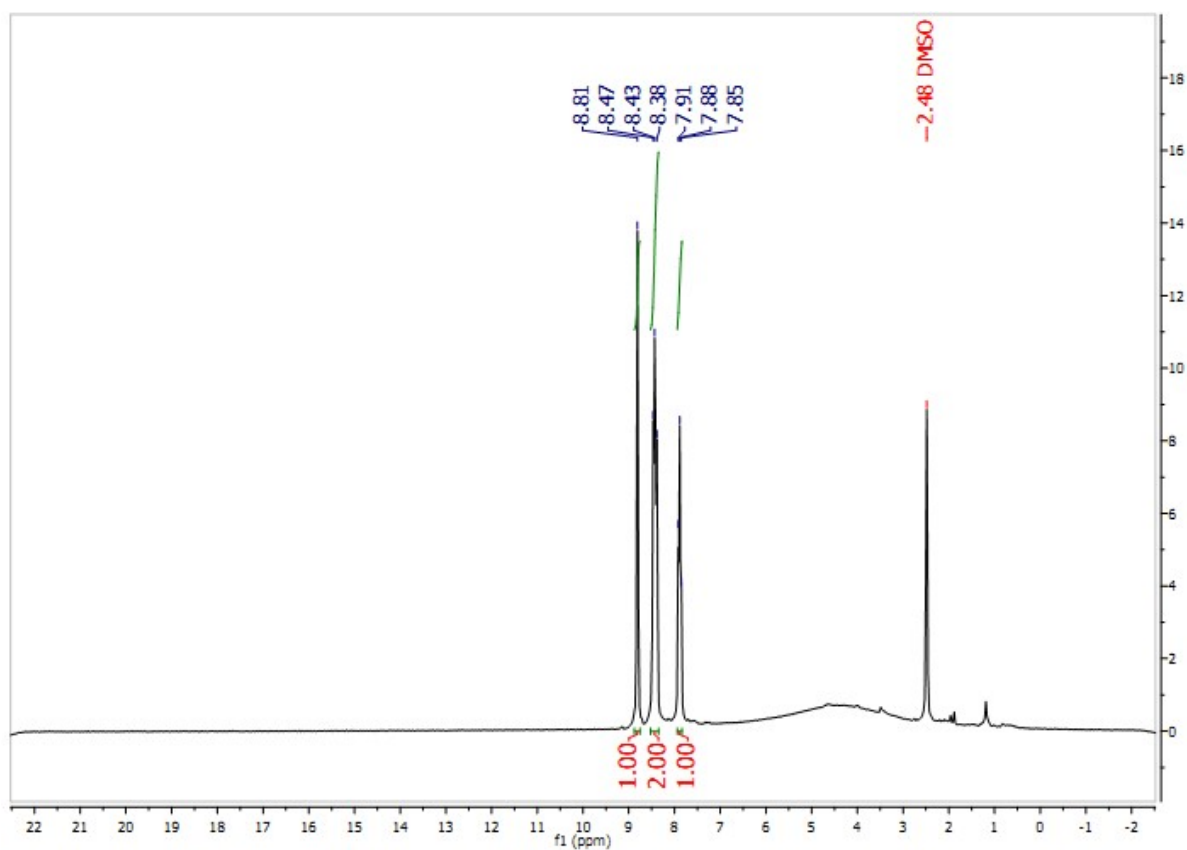

$^1\text{H}$  NMR spectrum of 5-(3-nitrophenyl)-1H-tetrazole from [3+2] cycloaddition of  $\text{NaN}_3$  with 3-nitrobenzonitrile

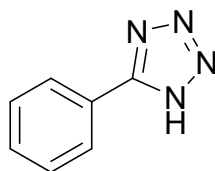

**5-phenyl-1H-tetrazole**

$^1\text{H}$  NMR (250 MHz, DMSO):  $\delta_{\text{H}} = 8.04$  (m, 2H), 7.59 (m, 3H) ppm.

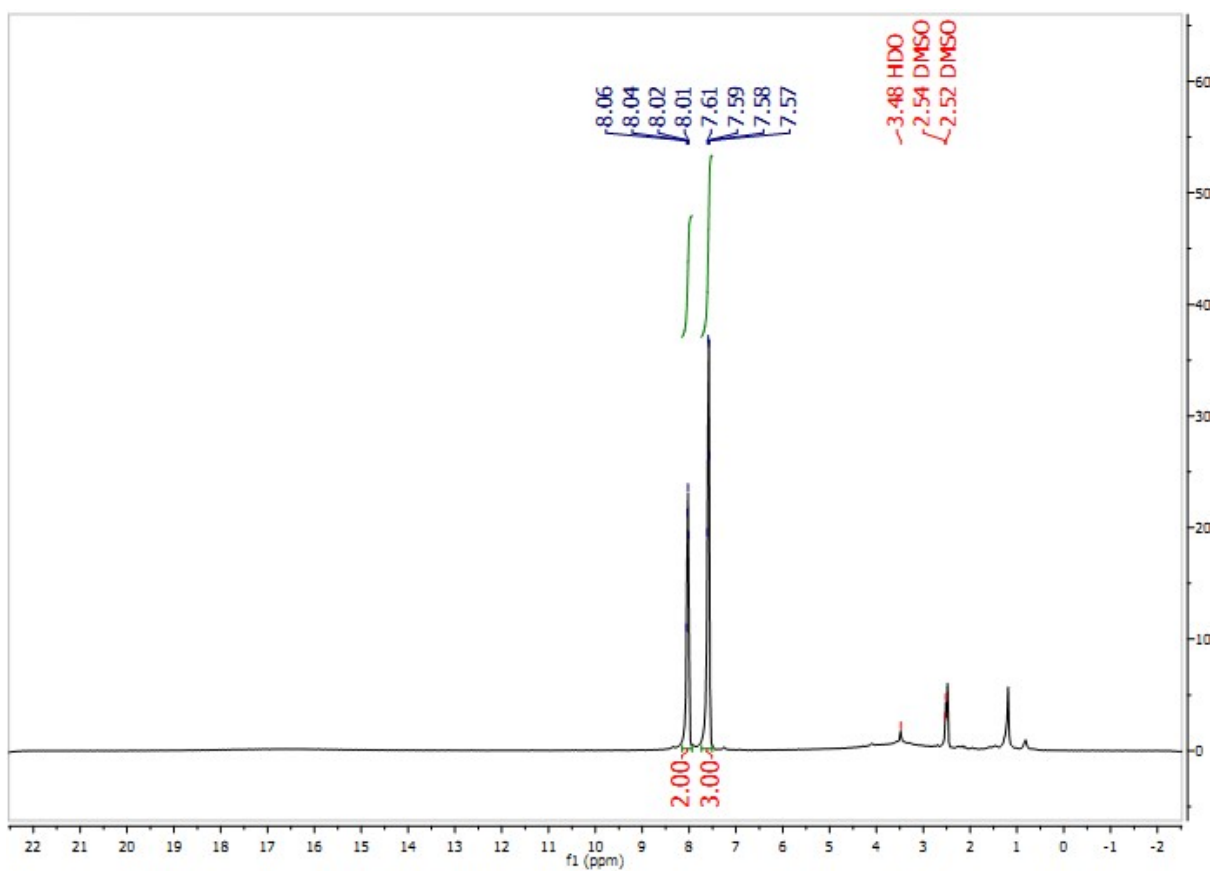

$^1\text{H}$  NMR spectrum of 5-phenyl-1H-tetrazole from [3+2] cycloaddition of  $\text{NaN}_3$  with 3-nitrobenzotrile

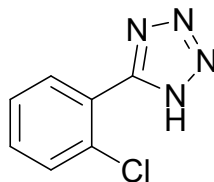

**5-(2-chlorophenyl)-1H-tetrazole**

$^1\text{H}$  NMR (250 MHz, DMSO):  $\delta_{\text{H}} = 7.79$  (d,  $J = 5.90$  Hz, 1H),  $7.70$  (d,  $J = 6.35$  Hz, 1H),  $7.58$  (m, 2H) ppm.

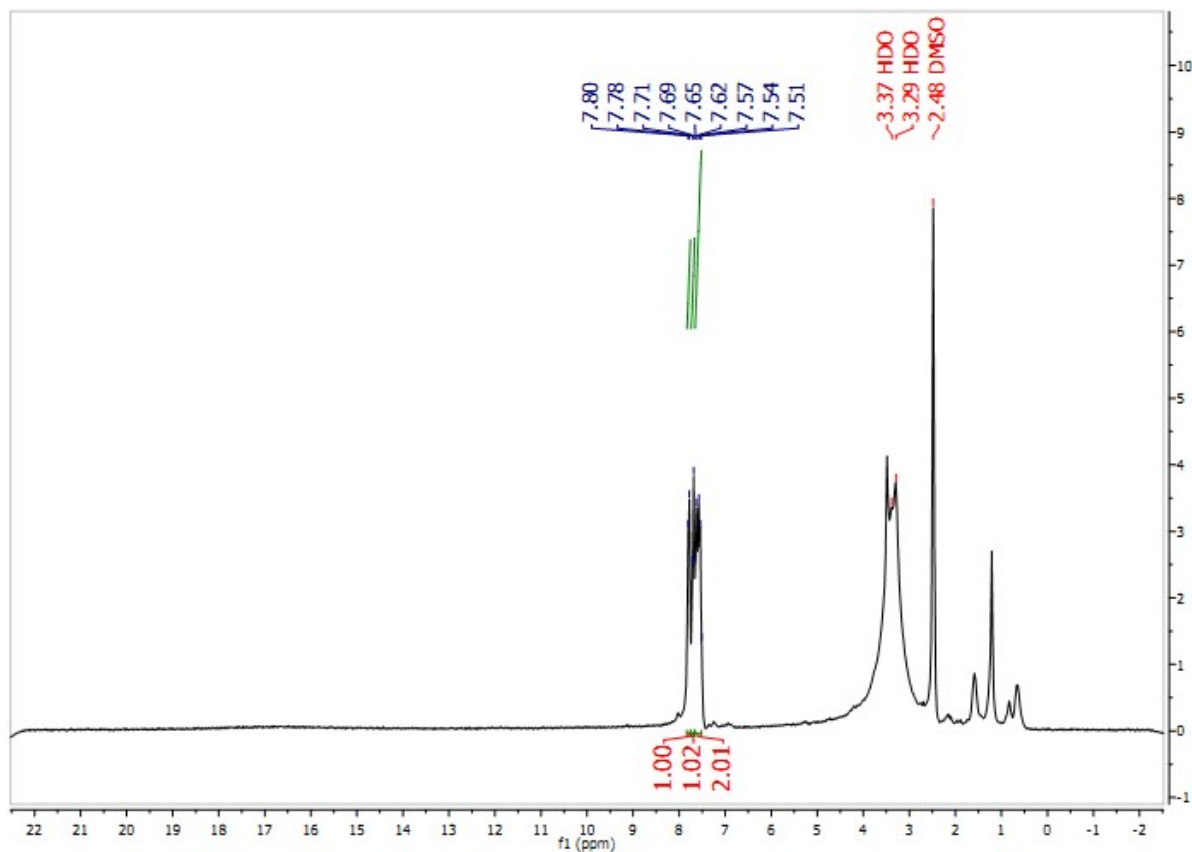

$^1\text{H}$  NMR spectrum of 5-(2-chlorophenyl)-1H-tetrazole from [3+2] cycloaddition of  $\text{NaN}_3$  with 2-chlorobenzonitrile

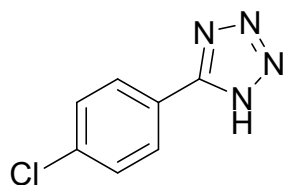

**5-(4-chlorophenyl)-1H-tetrazole**

$^1\text{H}$  NMR (250 MHz, DMSO):  $\delta_{\text{H}} = 8.03$  (d,  $J = 6.65$  Hz, 2H),  $7.67$  (d,  $J = 6.75$  Hz, 2H) ppm.

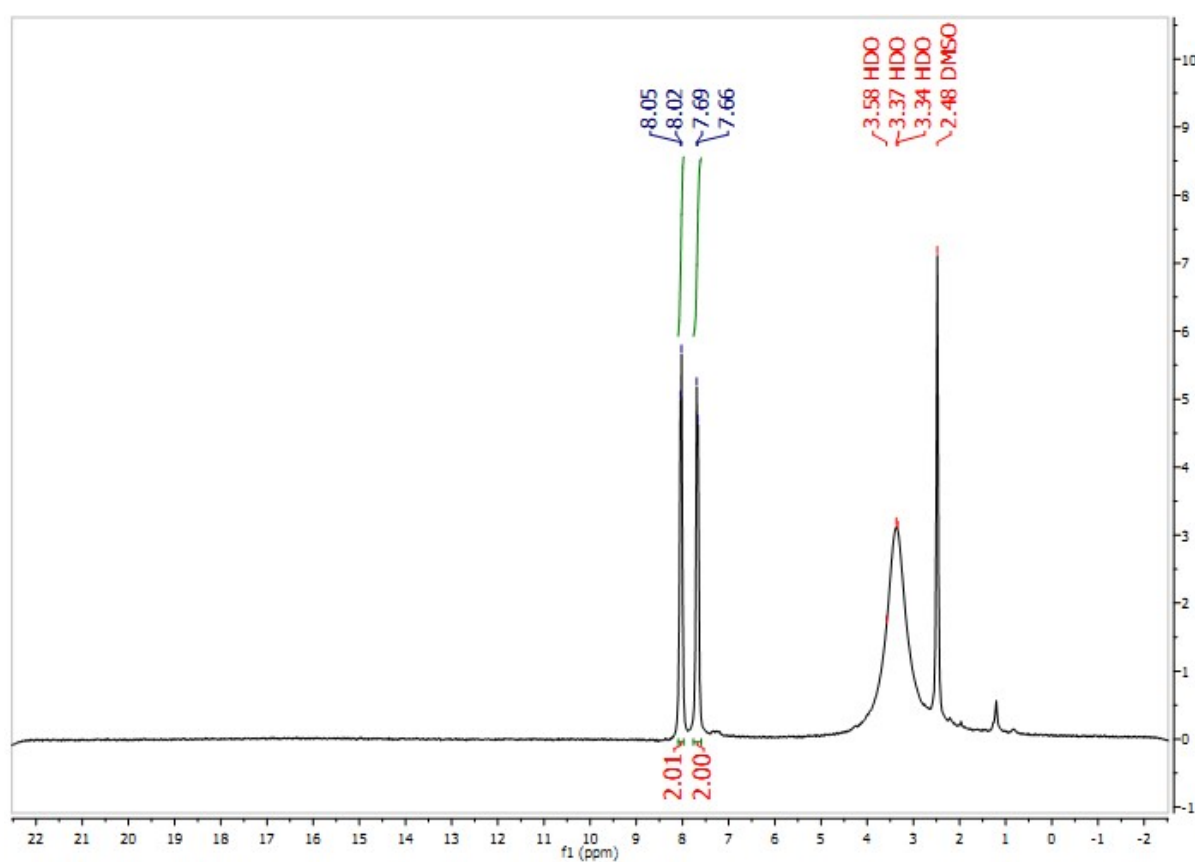

$^1\text{H}$  NMR spectrum of 5-(4-chlorophenyl)-1H-tetrazole from [3+2] cycloaddition of  $\text{NaN}_3$  with 4-chlorobenzonitrile
